# Supplementary material
Source: Springer Nature journal article supplement (https://www.springermedizin.de/resource/supplementary/12936_2012_2552_MOESM4_ESM.pdf/9542560)
Supplement: MOESM4 [file 9542560]

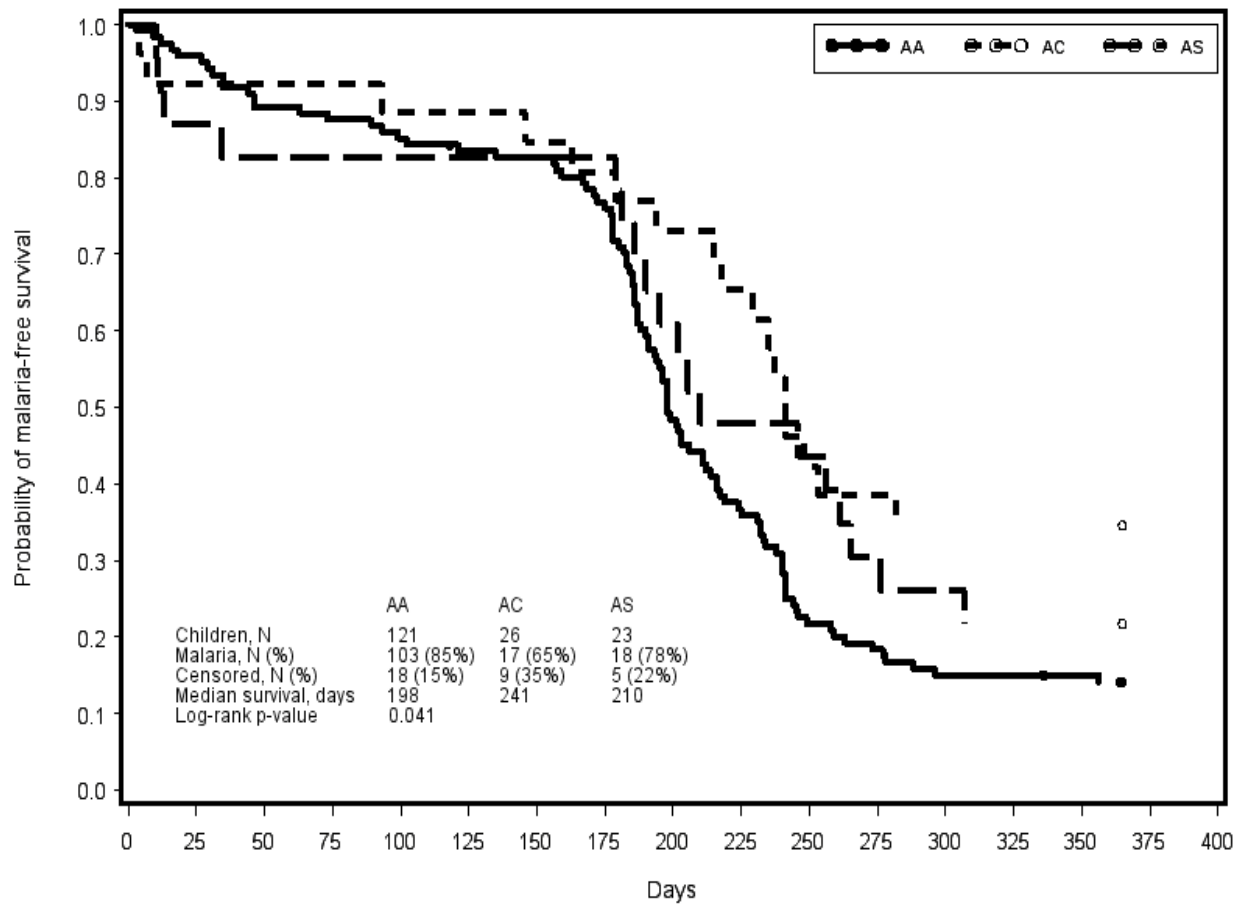

**Figure 3. Time to first malaria episode (fever and parasitemia >2500 parasites/ $\mu$ l) by hemoglobin abnormality among children aged 1-3 years, over one year follow-up**

Note figure3: Abnormal (AS /AC) genotype was associated with lower malaria risk relative to normal (AA) genotype among children age 1-3 yrs (Log Rank p = 0.04).
